# Supplementary material
Source: PubMed Central journal article supplement (PMC8137653)
Supplement: NIHMS1689686-supplement-Supplemental_Appendix_Figures_and_Tables.pdf [file NIHMS1689686-supplement-Supplemental_Appendix_Figures_and_Tables.pdf]

## SUPPLEMENTAL MATERIAL

### SUPPLEMENTAL FIGURES

Appendix Figure I. Flow Diagram

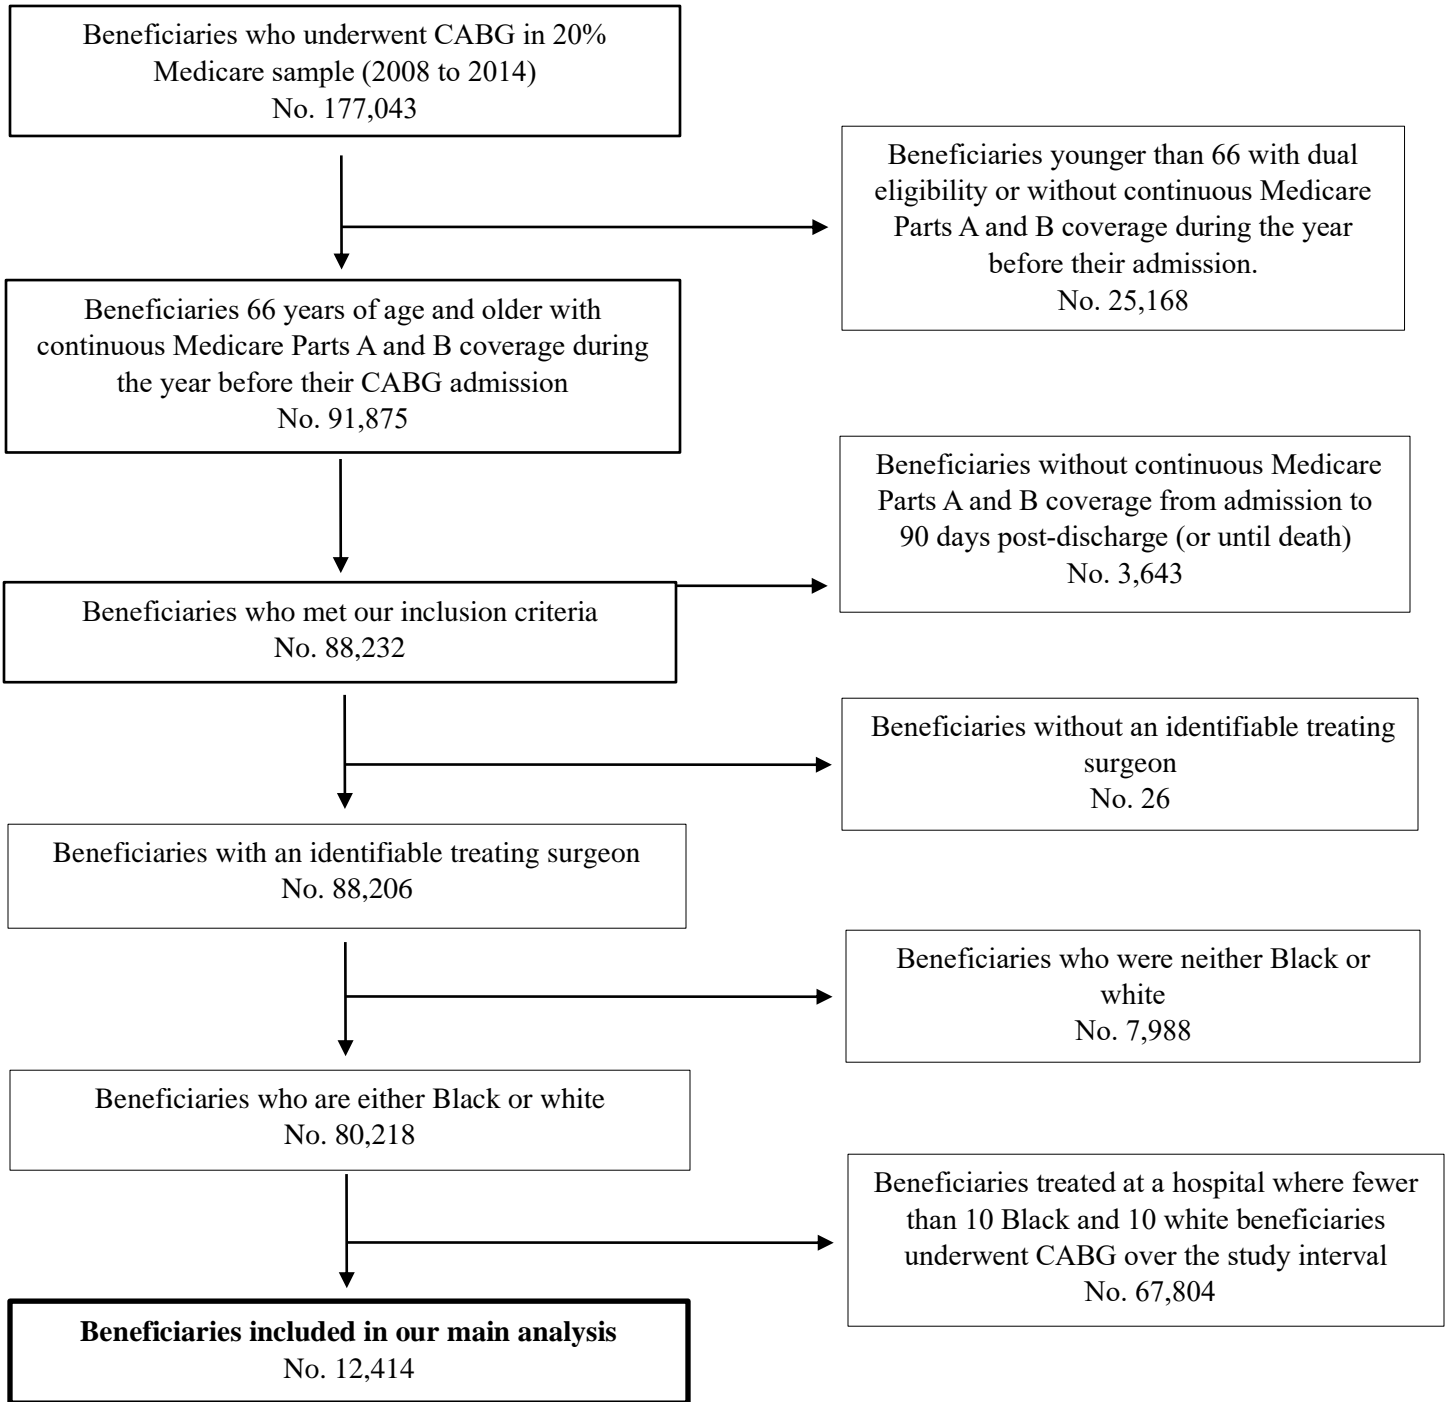

Appendix Figure II. Histogram Depicting the Variability in the Level of Provider Care Team Segregation across Hospitals in the Simulated Dataset

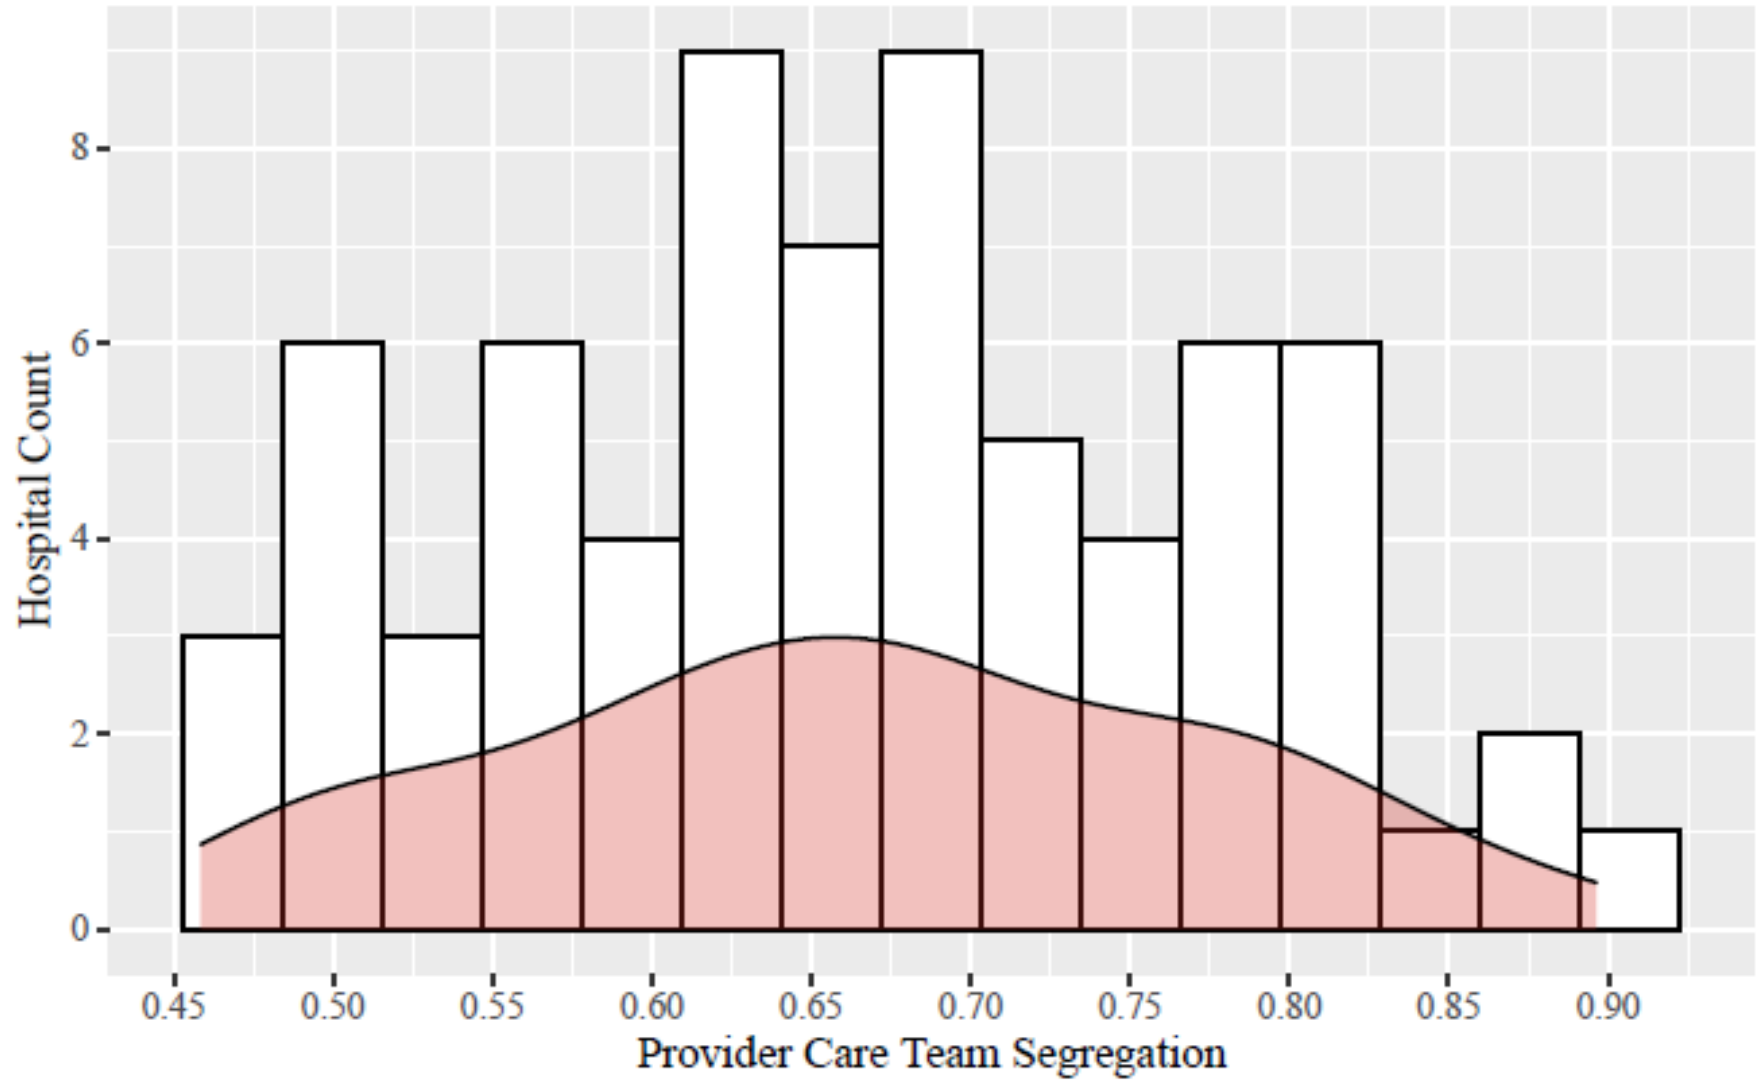

**SUPPLEMENTAL TABLES**

**Appendix Table I. Provider Care Team Size and Composition in Primary Analysis**

|                                                            | Overall Episode | 90 Days Prior<br>to Admission | Hospitalization | 90 Days<br>after Discharge |
|------------------------------------------------------------|-----------------|-------------------------------|-----------------|----------------------------|
| No. of providers in care team, median (IQR)                | 29 (21 to 40)   | 8 (5 to 12)                   | 16 (11 to 22)   | 7 (4 to 13)                |
| Provider specialties in care team, median percentage (IQR) |                 |                               |                 |                            |
| Diagnostic radiology                                       | 24 (20 to 30)   | 15 (7 to 22)                  | 29 (23 to 36)   | 14 (0 to 25)               |
| Cardiology                                                 | 19 (14 to 25)   | 24 (13 to 33)                 | 20 (13 to 29)   | 20 (13 to 33)              |
| Internal medicine                                          | 6 (3 to 10)     | 8 (0 to 17)                   | 2 (0 to 8)      | 9 (0 to 18)                |
| Anesthesiology                                             | 5 (3 to 6)      | 0 (0 to 0)                    | 8 (5 to 11)     | 0 (0 to 0)                 |
| Clinical laboratory                                        | 3 (0 to 5)      | 0 (0 to 11)                   | 0 (0 to 0)      | 0 (0 to 13)                |
| Emergency medicine                                         | 2 (0 to 4)      | 0 (0 to 7)                    | 0 (0 to 0)      | 0 (0 to 5)                 |
| Physician assistant                                        | 2 (0 to 4)      | 0 (0 to 0)                    | 0 (0 to 6)      | 0 (0 to 0)                 |
| Cardiac surgery                                            | 2 (0 to 4)      | 0 (0 to 0)                    | 4 (0 to 8)      | 0 (0 to 0)                 |
| Pulmonary disease                                          | 0 (0 to 5)      | 0 (0 to 0)                    | 0 (0 to 6)      | 0 (0 to 0)                 |
| Nurse practitioner                                         | 0 (0 to 4)      | 0 (0 to 0)                    | 0 (0 to 0)      | 0 (0 to 0)                 |
| Other                                                      | 26 (20 to 33)   | 30 (19 to 43)                 | 21 (14 to 29)   | 32 (19 to 44)              |

Abbreviations: IQR, interquartile range; No., number.

Appendix Table II. Provider Care Team Size and Composition in Sensitivity Analysis, Excluding Those Billing Providers Who Would Not Influence Operative Mortality or Are Not Involved in Face-to-Face Patient Care

|                                                            | Overall Episode | 90 Days Prior to Admission | Hospitalization | 90 Days after Discharge |
|------------------------------------------------------------|-----------------|----------------------------|-----------------|-------------------------|
| No. of providers in care team, median (IQR)                | 18 (13 to 26)   | 6 (3 to 8)                 | 10 (7 to 14)    | 5 (3 to 9)              |
| Provider specialties in care team, median percentage (IQR) |                 |                            |                 |                         |
| Cardiology                                                 | 31 (23 to 40)   | 33 (20 to 50)              | 33 (22 to 44)   | 33 (20 to 50)           |
| Internal medicine                                          | 10 (5 to 16)    | 11 (0 to 25)               | 3 (0 to 13)     | 14 (0 to 25)            |
| Anesthesiology                                             | 8 (5 to 11)     | 0 (0 to 0)                 | 13 (8 to 20)    | 0 (0 to 0)              |
| Emergency medicine                                         | 4 (0 to 7)      | 0 (0 to 10)                | 0 (0 to 0)      | 0 (0 to 7)              |
| Cardiac surgery                                            | 4 (0 to 7)      | 0 (0 to 0)                 | 6 (0 to 13)     | 0 (0 to 0)              |
| Physician assistant                                        | 2 (0 to 7)      | 0 (0 to 0)                 | 0 (0 to 10)     | 0 (0 to 0)              |
| Thoracic surgery                                           | 2 (0 to 6)      | 0 (0 to 0)                 | 0 (0 to 10)     | 0 (0 to 0)              |
| Pulmonary disease                                          | 0 (0 to 8)      | 0 (0 to 0)                 | 0 (0 to 8)      | 0 (0 to 0)              |
| Nurse practitioner                                         | 0 (0 to 6)      | 0 (0 to 0)                 | 0 (0 to 0)      | 0 (0 to 0)              |
| Family practice                                            | 0 (0 to 6)      | 0 (0 to 13)                | 0 (0 to 0)      | 0 (0 to 14)             |
| Other                                                      | 20 (13 to 29)   | 20 (0 to 33)               | 13 (0 to 24)    | 22 (0 to 38)            |

Abbreviations: IQR, interquartile range; No., number.

Appendix Table III. Comparisons between Black and White Patients within Hospital Segregation Levels.

| Characteristic           | All Hospitals<br>(Median = 0.89) |            |                 | Low Segregation<br>(Median = 0.84) |            |                 | Medium Segregation<br>(Median = 0.89) |            |                 | High Segregation<br>(Median = 0.92) |            |                 |
|--------------------------|----------------------------------|------------|-----------------|------------------------------------|------------|-----------------|---------------------------------------|------------|-----------------|-------------------------------------|------------|-----------------|
|                          | Black                            | White      | <i>P</i> -Value | Black                              | White      | <i>P</i> -Value | Black                                 | White      | <i>P</i> -Value | Black                               | White      | <i>P</i> -Value |
| No. of patients          | 1210                             | 11,204     |                 | 423                                | 2928       |                 | 446                                   | 3743       |                 | 341                                 | 4533       |                 |
| Age, mean (SD)           | 73.4 (5.4)                       | 74.9 (5.9) | <0.01           | 73.3 (5.5)                         | 74.9 (5.8) | <0.01           | 73.2 (5.1)                            | 74.7 (5.8) | <0.01           | 73.8 (5.8)                          | 75.0 (5.9) | <0.01           |
| Male (%)                 | 677 (56)                         | 7803 (70)  | <0.01           | 238 (56)                           | 1990 (68)  | <0.01           | 253 (57)                              | 2655 (71)  | <0.01           | 186 (55)                            | 3158 (70)  | <0.01           |
| Charlson score (%)       |                                  |            | <0.01           |                                    |            | 0.02            |                                       |            | <0.01           |                                     |            | <0.01           |
| 0                        | 221 (18)                         | 2668 (24)  |                 | 88 (21)                            | 757 (26)   |                 | 78 (17)                               | 892 (24)   |                 | 55 (16)                             | 1019 (22)  |                 |
| 1                        | 259 (21)                         | 2931 (26)  |                 | 103 (24)                           | 770 (26)   |                 | 93 (21)                               | 1001 (27)  |                 | 63 (18)                             | 1160 (26)  |                 |
| ≥2                       | 730 (60)                         | 5605 (50)  |                 | 232 (55)                           | 1401 (48)  |                 | 275 (62)                              | 1850 (49)  |                 | 223 (65)                            | 2354 (52)  |                 |
| Socioeconomic status (%) |                                  |            | <0.01           |                                    |            | <0.01           |                                       |            | <0.01           |                                     |            | <0.01           |
| Low                      | 603 (50)                         | 3441 (31)  |                 | 247 (58)                           | 1120 (38)  |                 | 197 (44)                              | 1037 (28)  |                 | 159 (47)                            | 1284 (28)  |                 |
| Medium                   | 330 (27)                         | 3711 (33)  |                 | 98 (23)                            | 846 (29)   |                 | 122 (27)                              | 1301 (35)  |                 | 110 (32)                            | 1564 (35)  |                 |
| High                     | 235 (19)                         | 3748 (33)  |                 | 63 (15)                            | 872 (30)   |                 | 111 (25)                              | 1316 (35)  |                 | 61 (18)                             | 1560 (34)  |                 |
| Missing                  | 42 (3)                           | 304 (3)    |                 | 15 (4)                             | 90 (3)     |                 | 16 (4)                                | 89 (2)     |                 | 11 (3)                              | 125 (3)    |                 |
| Elective procedure (%)   | 583 (48)                         | 6207 (55)  | <0.01           | 179 (42)                           | 1504 (51)  | <0.01           | 242 (54)                              | 2231 (60)  | 0.03            | 162 (48)                            | 2472 (55)  | 0.01            |

Abbreviations: HSA, hospital service area; No., number; PCP, primary care physician; PTCA, percutaneous transluminal coronary angioplasty; SD, standard deviation.

Appendix Table IV. Full Multivariable Model Results from Primary Analysis

| Variable                                                                                                            | Estimates for Each Variable |                 | Estimates for the Interaction of Each Variable with Black Status |                 |
|---------------------------------------------------------------------------------------------------------------------|-----------------------------|-----------------|------------------------------------------------------------------|-----------------|
|                                                                                                                     | Odds Ratio                  | 95% CI          | Odds Ratio                                                       | 9% CI           |
| Study year (referent: 2008)                                                                                         |                             |                 |                                                                  |                 |
| 2009                                                                                                                | 0.95                        | (0.74 to 1.23)  | 0.96                                                             | (0.43 to 2.17)  |
| 2010                                                                                                                | 0.91                        | (0.70 to 1.20)  | 0.59                                                             | (0.26 to 1.35)  |
| 2011                                                                                                                | 1.15                        | (0.92 to 1.44)  | 1.02                                                             | (0.52 to 2.00)  |
| 2012                                                                                                                | 0.95                        | (0.75 to 1.20)  | 1.16                                                             | (0.51 to 2.63)  |
| 2013                                                                                                                | 0.94                        | (0.73 to 1.21)  | 0.97                                                             | (0.42 to 2.19)  |
| 2014                                                                                                                | 0.98                        | (0.69 to 1.38)  | 0.48                                                             | (0.15 to 1.48)  |
| Patient-level                                                                                                       |                             |                 |                                                                  |                 |
| Black                                                                                                               | 6.23                        | (0.09 to 420.1) | -                                                                | -               |
| Age                                                                                                                 | 1.08                        | (1.07 to 1.09)  | 1.00                                                             | (0.96 to 1.04)  |
| Female                                                                                                              | 1.37                        | (1.18 to 1.59)  | 0.81                                                             | (0.51 to 1.29)  |
| Charlson score (referent: 0)                                                                                        |                             |                 |                                                                  |                 |
| 1                                                                                                                   | 1.12                        | (0.89 to 1.40)  | 0.88                                                             | (0.34 to 2.26)  |
| ≥2                                                                                                                  | 1.98                        | (1.61 to 2.45)  | 1.06                                                             | (0.47 to 2.39)  |
| Socioeconomic status (referent: low)                                                                                |                             |                 |                                                                  |                 |
| Medium                                                                                                              | 1.01                        | (0.84 to 1.21)  | 0.43                                                             | (0.25 to 0.74)  |
| High                                                                                                                | 0.85                        | (0.69 to 1.05)  | 0.56                                                             | (0.29 to 1.09)  |
| Elective procedure                                                                                                  | 0.60                        | (0.52 to 0.70)  | 0.75                                                             | (0.45 to 1.26)  |
| Hospital-level                                                                                                      |                             |                 |                                                                  |                 |
| Provider care team segregation (referent: low)                                                                      |                             |                 |                                                                  |                 |
| Medium segregation                                                                                                  | 1.14                        | (0.90 to 1.46)  | 1.3                                                              | (0.62 to 2.72)  |
| High segregation                                                                                                    | 0.92                        | (0.69 to 1.24)  | 2.88                                                             | (1.20 to 6.93)  |
| No. of patients undergoing CABG                                                                                     | 1.00                        | (1.00 to 1.00)  | 1.00                                                             | (0.99 to 1.00)  |
| No. of Black patients undergoing CABG                                                                               | 1.01                        | (1.00 to 1.02)  | 1.02                                                             | (0.99 to 1.05)  |
| No. of providers in a hospital's care team network                                                                  | 1.00                        | (1.00 to 1.00)  | 1.00                                                             | (1.00 to 1.00)  |
| Proportion of patients from outside the CBSA                                                                        | 1.17                        | (0.76 to 1.78)  | 2.27                                                             | (0.38 to 13.67) |
| Ownership (referent: for-profit)                                                                                    |                             |                 |                                                                  |                 |
| Non-profit                                                                                                          | 0.95                        | (0.50 to 1.79)  | 0.76                                                             | (0.20 to 2.84)  |
| Other                                                                                                               | 0.99                        | (0.50 to 1.98)  | 0.63                                                             | (0.14 to 2.90)  |
| Bed size (referent: <250 beds)                                                                                      |                             |                 |                                                                  |                 |
| 251 – 500 beds                                                                                                      | 0.74                        | (0.49 to 1.12)  | 0.88                                                             | (0.27 to 2.91)  |
| >500 beds                                                                                                           | 0.60                        | (0.38 to 0.96)  | 0.78                                                             | (0.22 to 2.73)  |
| Geographic region (referent: South)                                                                                 |                             |                 |                                                                  |                 |
| Northeast                                                                                                           | 0.88                        | (0.61 to 1.27)  | 1.21                                                             | (0.34 to 4.28)  |
| Midwest                                                                                                             | 0.98                        | (0.73 to 1.31)  | 0.90                                                             | (0.32 to 2.54)  |
| Teaching hospital                                                                                                   | 1.14                        | (0.74 to 1.76)  | 1.37                                                             | (0.47 to 3.98)  |
| HSA-level                                                                                                           |                             |                 |                                                                  |                 |
| No. of acute care hospital beds per 1000 residents                                                                  | 1.18                        | (0.91 to 1.51)  | 0.56                                                             | (0.30 to 1.06)  |
| No. of PCPs, per 100,000 residents                                                                                  | 0.99                        | (0.98 to 1.00)  | 1.01                                                             | (0.97 to 1.05)  |
| No. of medical specialists per 100,000 residents                                                                    | 0.99                        | (0.97 to 1.01)  | 0.99                                                             | (0.93 to 1.05)  |
| No. of surgeons per 100,000 residents                                                                               | 1.02                        | (1.00 to 1.04)  | 1.01                                                             | (0.94 to 1.09)  |
| Total resident population, in thousands                                                                             | 1.00                        | (1.00 to 1.00)  | 1.00                                                             | (1.00 to 1.00)  |
| Total Black population, in thousands                                                                                | 1.00                        | (1.00 to 1.00)  | 1.00                                                             | (1.00 to 1.00)  |
| Total Hispanic population, in thousands                                                                             | 1.00                        | (1.00 to 1.00)  | 1.00                                                             | (1.00 to 1.00)  |
| Proportion of residents living below federal poverty line                                                           | 0.10                        | (0.01 to 1.11)  | 0.03                                                             | (0.00 to 1366)  |
| Proportion of residents that obtained a graduate or professional degree, among residents that are 25 years or older | 0.61                        | (0.10 to 3.63)  | 0.17                                                             | (0.00 to 434.9) |
| Proportion of residents living in a rural area                                                                      | 0.75                        | (0.34 to 1.69)  | 2.65                                                             | (0.15 to 47.65) |

Abbreviations: CBSA, core-based statistical area; CABG, coronary artery bypass grafting; CI, confidence interval; HAS, hospital service area; No., number; PCP, primary care provider.
