# Supplementary material
Source: PubMed Central journal article supplement (PMC8137653)
Supplement: NIHMS1689686-supplement-Supplemental_Material_-_Disparities_checklist.pdf [file NIHMS1689686-supplement-Supplemental_Material_-_Disparities_checklist.pdf]

| <b>AHA Journals Racial and Ethnic Disparities Reporting Guidelines</b> |                 |                                                                                                                                                                            |                                                                               |
|------------------------------------------------------------------------|-----------------|----------------------------------------------------------------------------------------------------------------------------------------------------------------------------|-------------------------------------------------------------------------------|
| <b>Section/Topic</b>                                                   | <b>Item No.</b> | <b>Recommendation</b>                                                                                                                                                      | <b>Provide page # in text / Confirm that this was “done throughout” / N/A</b> |
| <b>Introduction</b>                                                    |                 |                                                                                                                                                                            |                                                                               |
|                                                                        | 1a              | Discuss a framework (e.g., conceptual model) for studying race and/or ethnicity in this context                                                                            | Page 4, Paragraph 2                                                           |
|                                                                        | 1b              | Discuss social and structural forms of racism and/or bias                                                                                                                  | Page 4, Paragraph 2                                                           |
| <b>Methods</b>                                                         |                 |                                                                                                                                                                            |                                                                               |
| Categorization of race/ethnicity                                       | 2a              | Describe categorization of race and ethnicity (e.g., self-identification)                                                                                                  | Page 5, Paragraph 3                                                           |
|                                                                        | 2b              | If race and ethnicity are codified by others, be specific in conveying how the categories were attributed                                                                  | Page 5, Paragraph 3                                                           |
|                                                                        | 2c              | Describe potential limitations of existing data sources                                                                                                                    | Page 5, Paragraph 3                                                           |
| <b>Terminology</b>                                                     |                 |                                                                                                                                                                            |                                                                               |
|                                                                        | 3a              | Capitalize race and ethnicity terms and use as adjectives rather than nouns (e.g., “Black patients,” not “blacks”, “White patients,” not “whites”, etc.)                   | Done throughout the article                                                   |
|                                                                        | 3b              | Describe specific racial and ethnic makeup of smaller population groups; when possible avoid “non-White” or “Other”                                                        | N/A                                                                           |
|                                                                        | 3c              | Use accurate terminology: Hispanic and Latino/a/-x are ethnicities; the term “White” is preferred over Caucasian                                                           | Done throughout                                                               |
| <b>Analyses</b>                                                        |                 |                                                                                                                                                                            |                                                                               |
|                                                                        | 4a              | Provide context and analytical use of race/ethnicity as a covariate in risk-adjustment models                                                                              | Page 8, Paragraph 1                                                           |
| <b>Results</b>                                                         |                 |                                                                                                                                                                            |                                                                               |
|                                                                        | 5a              | Avoid statements of causal inference or culpability (e.g., “Black adults did not respond to x medication.” Instead, “Among Black adults, x medication was less effective”) | Done throughout the article                                                   |
| <b>Discussion</b>                                                      |                 |                                                                                                                                                                            |                                                                               |
|                                                                        | 6a              | Describe the relevant structural and social factors that influence the study question                                                                                      | Page 13, Paragraph 1                                                          |
|                                                                        | 6b              | Avoid using genetics in isolation to explain social constructs                                                                                                             | Done throughout                                                               |
